# Supplementary material for: Hydrological Similarity-Based Parameter Regionalization under Different Climate and Underlying Surfaces in Ungauged Basins
Source: MDPI journal article supplement (doi:10.3390/w13182508), 2021-09-13
Supplement: s1 [file s1]

Table S2. Weight of climate and underlying surface factors for physical similarity in Poyang lake Basin

| Basin       | Climate | Vegetation &<br>land use | Soil    | Landform &<br>geology | Terrain | Human<br>activity | Watershed<br>morphology |
|-------------|---------|--------------------------|---------|-----------------------|---------|-------------------|-------------------------|
| Wanjiabu    | 2.1248  | 0.7524                   | -0.8688 | -0.1072               | 2.8602  | -2.1484           | -2.2508                 |
| Maygang     | 0.1495  | -1.8732                  | -1.4816 | -0.6760               | 1.6311  | -4.2500           | -2.2483                 |
| Xiajiang    | -0.4159 | -1.1525                  | 0.7523  | 0.2102                | -0.1131 | -0.3452           | 4.5111                  |
| Shicheng    | 0.2960  | 0.6391                   | -0.6952 | -0.4333               | 0.2969  | 2.9737            | -1.8170                 |
| Ningdu      | -0.1164 | -0.4714                  | 0.3817  | -0.8397               | -0.6085 | 2.0003            | -1.5658                 |
| Mazhou      | -1.8774 | 2.1870                   | 1.4860  | -0.0133               | -1.1110 | 2.2973            | -1.4154                 |
| Hanlinqiao  | -0.5256 | -3.5137                  | -1.6871 | -0.2311               | -1.1413 | 0.7090            | -1.3730                 |
| Julongtan   | -1.1159 | 0.8339                   | 0.4560  | 0.2659                | -1.2920 | 0.7345            | -0.5979                 |
| Bashang     | -0.7744 | -1.1462                  | -0.9449 | 1.3465                | 0.6849  | -2.5335           | -0.6192                 |
| Linkeng     | 1.8050  | 6.2718                   | -0.7842 | 1.6522                | 2.0947  | 2.2333            | -1.4703                 |
| Shangshalan | 1.2204  | 0.9853                   | -0.4476 | 0.5761                | 0.5899  | 1.0780            | -0.9951                 |
| Saitang     | 1.2368  | 0.5181                   | -0.5767 | 0.8585                | 1.2779  | 0.6884            | -1.3560                 |
| Baisha      | 0.3866  | 5.6503                   | 1.2346  | 1.0172                | -0.5081 | 2.7038            | -1.5896                 |
| Xintian     | 0.3009  | 1.1012                   | -0.1212 | -0.8915               | -0.3896 | 1.5638            | -1.4468                 |
| Gao An      | 1.0958  | -0.3088                  | -1.3067 | -0.4992               | -0.9757 | -2.4824           | -1.1567                 |
| Fenkeng     | -0.9504 | -1.3505                  | 1.1034  | -0.8642               | -0.9608 | 1.5085            | -1.0403                 |
| Waizhou     | -0.0396 | -2.6563                  | 0.3641  | -0.0475               | -0.2405 | -3.8892           | 6.4673                  |
| Xiashan     | -1.4350 | -1.0182                  | 1.2996  | -0.3542               | -0.9908 | 0.8475            | 0.0426                  |
| Dongbei     | -1.0302 | -1.2543                  | 0.9004  | 0.2751                | -0.2866 | -0.5491           | 2.5435                  |
| Jian        | -0.5088 | -1.0214                  | 0.8133  | 0.3336                | -0.0674 | -0.2957           | 4.0227                  |
| Zhangshu    | -0.2152 | -1.6927                  | 0.6562  | 0.0783                | -0.1387 | -2.1933           | 5.3269                  |
| Weight      | 0.0942  | 0.1166                   | 0.1098  | 0.0717                | 0.1957  | 0.0890            | 0.3230                  |

Table S3. Physical similarity and spatial similarity of Poyang Lake Basin Based on leave-one-out cross validation

|             | Physical similarity |                   |                              | Spatial similarity /m |                   |                              |
|-------------|---------------------|-------------------|------------------------------|-----------------------|-------------------|------------------------------|
|             | Xiushui<br>River    | Xinjiang<br>River | Ganjiang River<br>(Xiajiang) | Xiushui<br>River      | Xinjiang<br>River | Ganjiang River<br>(Xiajiang) |
| Wanjiabu    | -                   | <b>1.33</b>       | 0.50                         | -                     | 240853            | 282511                       |
| Maygang     | <b>1.36</b>         | -                 | 0.57                         | 240853                | -                 | 340173                       |
| Xiajiang    | 0.50                | 0.57              | -                            | 282511                | 340173            | -                            |
| Shicheng    | 1.04                | 1.17              | 0.72                         | 286835                | 232083            | 144358                       |
| Ningdu      | 0.73                | 0.93              | 0.87                         | 239497                | 233853            | 109760                       |
| Mazhou      | 0.58                | 0.60              | 0.70                         | 391844                | 378049            | 129470                       |
| Hanlinqiao  | 0.66                | 0.97              | 0.71                         | 272815                | 307814            | 36729                        |
| Julongtan   | 0.64                | 0.66              | 0.91                         | 410488                | 447855            | 128432                       |
| Bashang     | 0.89                | 1.22              | 0.83                         | 353555                | 431255            | 91082                        |
| Linkeng     | 1.11                | 0.76              | 0.47                         | 263942                | 377566            | 78533                        |
| Shangshalan | 1.10                | 0.95              | 0.77                         | 230073                | 368720            | 111994                       |
| Saitang     | 1.33                | 1.17              | 0.68                         | 181480                | 333014            | 134291                       |
| Baisha      | 0.61                | 0.61              | 0.66                         | 225790                | 260159            | 80460                        |

|          |      |      |             |              |               |              |
|----------|------|------|-------------|--------------|---------------|--------------|
| Xintian  | 0.84 | 0.95 | 0.80        | 180291       | <b>227609</b> | 122331       |
| Gaoan    | 0.93 | 1.13 | 0.70        | <b>75879</b> | 286198        | 228678       |
| Fenkeng  | 0.59 | 0.77 | 0.89        | 272136       | 254644        | 103953       |
| Waizhou  | 0.45 | 0.57 | 1.67        | 231904       | 308886        | 50771        |
| Xiashan  | 0.56 | 0.66 | 1.02        | 318992       | 312136        | 84468        |
| Dongbei  | 0.54 | 0.62 | 2.71        | 330557       | 367333        | 49680        |
| Jian     | 0.51 | 0.58 | <b>9.56</b> | 296082       | 351833        | <b>13824</b> |
| Zhangshu | 0.50 | 0.59 | 3.93        | 262496       | 329159        | 20469        |
