# Supplementary figures and images for: Hydrological Similarity-Based Parameter Regionalization under Different Climate and Underlying Surfaces in Ungauged Basins
Source: MDPI journal article supplement (doi:10.3390/w13182508), 2021-09-13

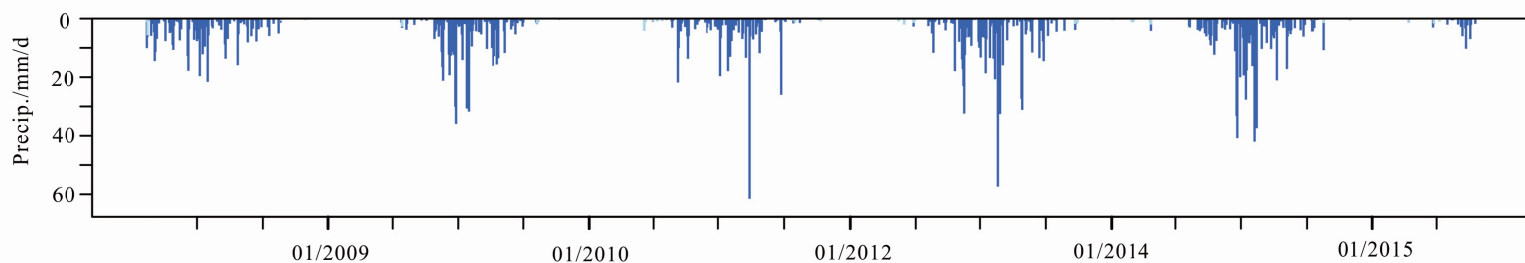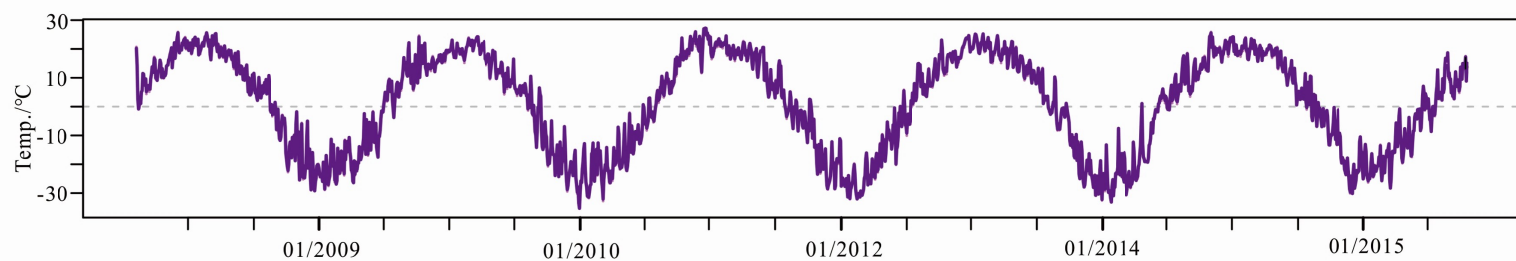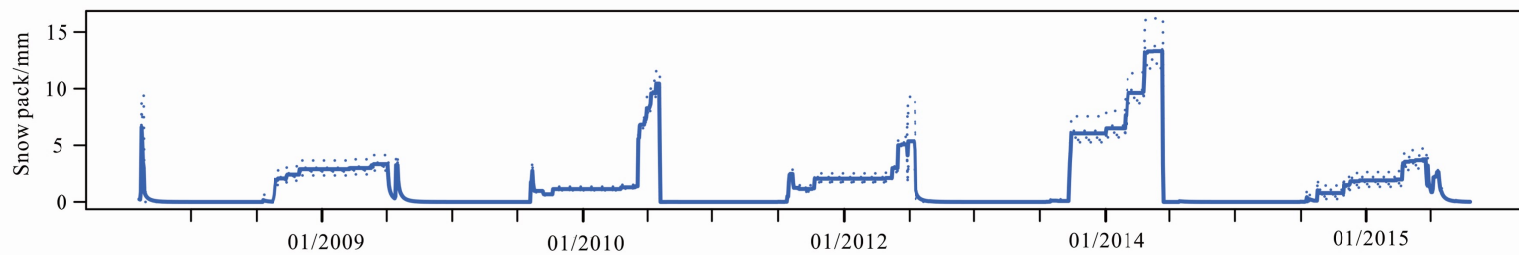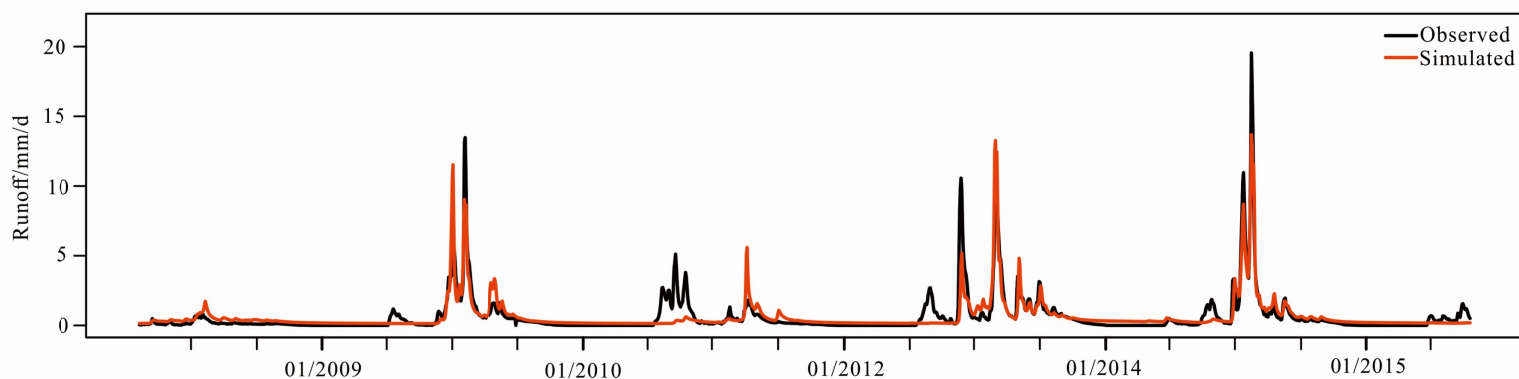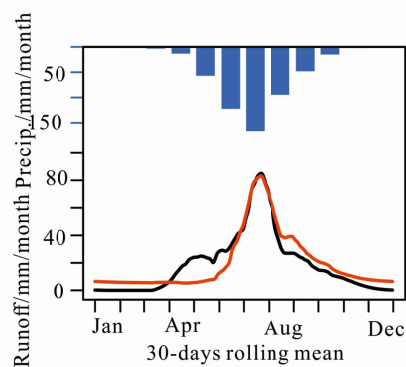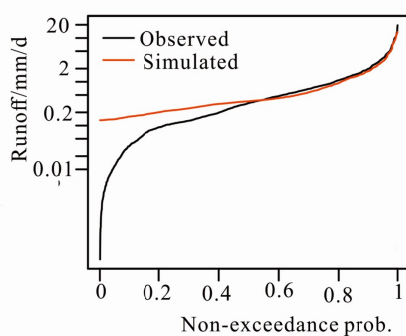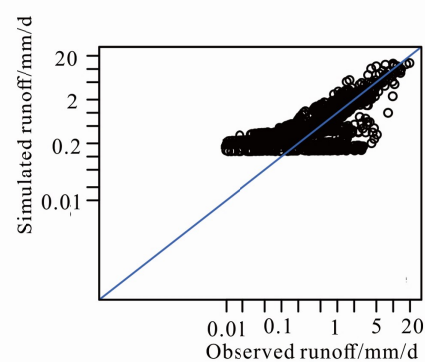

Supplement: s1 [file s1]
